# Supplementary material for: A set of methods to quantitatively evaluate the below-cloud evaporation effect on precipitation isotopic composition: a case study in a city located in the semi-arid regions of Chinese Loess Plateau
Source: Copernicus journal article supplement (doi:10.5194/acp-2020-312), 2020-05-26
Supplement: Supplementary file [file acp-2020-312-RC1-supplement.pdf]

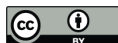

1 **A set of methods to quantitatively evaluate the below-cloud evaporation**  
2 **effect on precipitation isotopic composition: a case study in a city located**  
3 **in the semi-arid regions of Chinese Loess Plateau**

4

5 Meng Xing<sup>1,2\*</sup>, Weiguo Liu<sup>1,2,3\*</sup>, Jing Hu<sup>1,2</sup>

6

7

8 1.State Key Laboratory of Loess and Quaternary Geology, Institute of Earth  
9 Environment, Chinese Academy of Sciences, Xi'an, 710061, China

10 2.CAS Center for Excellence in Quaternary Science and Global Change, Xi'an,  
11 710061, China.

12 3. University of Chinese Academy of Sciences, Beijing, 100049, China

13

14 Corresponding authors:

15 Meng Xing email address: [xingmeng@ieecas.cn](mailto:xingmeng@ieecas.cn)

16 Weiguo Liu email address: [liuwg@loess.llqg.ac.cn](mailto:liuwg@loess.llqg.ac.cn)

17

18

19

20

21

22

23

24

25

26

27

28

29

30



31

32 Abstract:

33 Below-cloud evaporation effect heavily alters the initial precipitation isotopic  
34 composition, especially in the arid and semi-arid regions, and leads to misinterpreting  
35 the isotopic signal. To correctly explore the information contained in the precipitation  
36 isotopes, the first step is to qualitatively analyze the falling raindrops encountered  
37 below-cloud processes, and then to quantitatively compute the below-cloud  
38 evaporation ratio of raindrops. Here, based on two-year precipitation and water vapor  
39 isotopic observations in Xi'an, we systematically evaluated the variations of  
40 precipitation and water vapor isotopes caused by the below-cloud evaporation effect.  
41 Our results suggest that the equilibrium method could be successfully used to predict  
42 the ground-level water vapor isotopic composition in semi-arid climates, especially for  
43 the winter data. Moreover, by using  $\Delta d\Delta\delta$ -diagram, our data showed that evaporation  
44 is the mainly happened below-cloud process of raindrops, while snowfall samples  
45 retained the initial cloud signal because of less isotopic exchange between vapor and  
46 solid phases. In terms of meteorological factors, both temperature, relative humidity,  
47 and precipitation amount affect the intensity of below-cloud evaporation. In arid and  
48 semi-arid regions, the below-cloud evaporation ratio computed by the mass  
49 conservation equation would be overestimated relative to the isotopic method, while  
50 relative humidity is the most sensitive parameter in computing the remaining fraction  
51 of evaporation. In the Chinese Loess Plateau (CLP) city, raindrops are weakly  
52 evaporated in autumn and winter, and heavily evaporated in spring and summer, and  
53 in the meantime, the evaporation intensity is related to the local relative humidity. Our  
54 work sets an integrated and effective method to evaluate the below-cloud evaporation  
55 effect, and it will improve our understanding of the information contained in  
56 precipitation isotopic signals.

57

58

59

60

61

62

63

64

65



66 **1 Introduction**

67 Hydrogen and oxygen isotopes of precipitation are the one of greatly important tools  
68 to trace the hydrological cycle and climate changes (Bowen et al., 2019; Gat, 1996).  
69 For the paleoenvironment, the isotopic signals of precipitation recorded in ice cores  
70 (Thompson et al., 2000; Yao et al., 1996), tree rings (Liu et al., 2004; Liu et al., 2017b),  
71 speleothems (Cai et al., 2010; Tan et al., 2014), and leaf wax of loess-paleosol  
72 deposits (Wang et al., 2018b) and lake sediments (Liu et al., 2017a, 2019) could be  
73 used to reconstruct the information of temperature, precipitation, and hydrological  
74 regimes in geologic history, as it had participated into the formation or growth of these  
75 geological archives. For the modern environment, the isotopic ratios of precipitation  
76 could be used to quantitatively constraint the water vapor contribution from advection  
77 (Peng et al., 2011), evaporation (Sun et al., 2020; Wang et al., 2016a), transpiration  
78 (Li et al., 2016a; Zhao et al., 2019), and even anthropogenic activities (Fiorella et al.,  
79 2018; Gorski et al., 2015), as precipitation itself is one of the most important parts of  
80 the water circulation processes. Due to the limitations from sampling and theory,  
81 however, there remains some uncertainty to decipher the information contained in  
82 precipitation by using hydrogen and oxygen isotopic ratios (Bowen et al., 2019; Yao et  
83 al., 2013).

84  
85 Chinese Loess Plateau (CLP) is located in the arid and semi-arid areas, where the  
86 below-cloud evaporation and surface moisture evaporation effects on precipitation  
87 isotopes have been widely proved (Sun et al., 2020; Wan et al., 2018; Zhang and Wang,  
88 2016), which means the information remained in precipitation isotopic composition  
89 may have been remodeled by the environmental factors. Therefore, before we utilize  
90 precipitation isotopes to reconstruct the climate changes or to trace the water vapor  
91 sources, we first need to have a set of reliable evaluation systems to diagnose whether  
92 the precipitation isotopic ratios have been distorted by the below-cloud evaporation  
93 effect. Second, we should quantitatively calculate the below-cloud evaporation ratio of  
94 precipitation. Lastly, we can be able to use the calibrated precipitation isotopes to  
95 discuss regional water vapor sources or global hydrological cycle after we exclude the  
96 below-cloud evaporation effect. But the present situation is that there is still a large gap  
97 in our understanding at the first and second steps, and hence further study is needed.

98  
99 Over the past decades, to determine whether the hydrometeors have been evaporated  
100 during its falling, most studies depend on a second-order isotopic parameter (Jeelani  
101 et al., 2018; Li and Garziona, 2017), deuterium excess (defined as d-excess=  $\delta^2\text{H}$ -



102  $8 \times \delta^{18}\text{O}$ ), which is the representative of the kinetic fractionations, since  $^2\text{H}^1\text{H}^{16}\text{O}$   
103 equilibrate faster than  $^1\text{H}_2^{18}\text{O}$  in different phases (Clark and Fritz, 1997; Dansgaard,  
104 1964). The lighter isotopes ( $^1\text{H}$  and  $^{16}\text{O}$ ) of raindrop are preferentially evaporated from  
105 the liquid phase during its falling through unsaturated ambient air, which results in a  
106 decrease of d-excess in rain. Accordingly, the d-excess in the surrounding water vapor  
107 will increase. The slope of the local meteoric water line (LMWL) has also been widely  
108 used as a metric to infer the below-cloud evaporation effect according to the theory of  
109 water isotopic equilibrium fractionation (Chakraborty et al., 2016; Putman et al., 2019;  
110 Wang et al., 2018a), in which the LMWL's slopes approximately equal to 8.0 belonging  
111 to equilibrium fractionation and that is lower than 8.0 pointing to a non-equilibrium  
112 fractionation, such as the re-evaporation of raindrops. Nonetheless, it should be noted  
113 that a change of air masses, condensation in supersaturation conditions, and moisture  
114 exchange in the cloud and sub-cloud layer also cause largely spatial variation in slopes  
115 and d-excess values (Graf et al., 2019; Putman et al., 2019; Tian et al., 2018). As an  
116 improvement, simultaneous observations of water vapor and precipitation are applied  
117 to distinguish these processes and quantify below-cloud processes. Yu et al. (2015,  
118 2016) used the custom-made sampling devices to collect daily water vapor samples  
119 over the Tibetan and Pamir Plateau, and discussed moisture source impacts on the  
120 precipitation isotopes. With the aid of the off-line water vapor sampling system,  
121 Deshpande et al. (2010) analyzed the rain-vapor interaction using stable isotopes.  
122 However, the old water vapor cryogenic trapping technique is time-consuming  
123 (Christner et al., 2018), labor-intensive (Welp et al., 2012), and discrete (Wen et al.,  
124 2016), limiting the further examination of the two-phase system.

125

126 In recent years, with the progress in optical laser systems, the relatively portable field-  
127 deployable laser spectroscopic instruments, simultaneously measuring  $^1\text{H}_2^{16}\text{O}$ ,  
128  $^2\text{H}^1\text{H}^{16}\text{O}$ , and  $^1\text{H}_2^{18}\text{O}$  isotopes, allows performing online, autonomous, and long-term  
129 site measurements of the water vapor stable isotopic composition (Aemisegger et al.,  
130 2012; Christner et al., 2018). The emergence of this instrument exerts a great impact  
131 on the study of water vapor isotopic composition, leading to a substantially increased  
132 number of observations in near-ground water vapor, and deepens our knowledge in  
133 water vapor isotopic variations and fractionation processes during the two-phase  
134 transformation (Noone et al., 2011; Steen-Larsen et al., 2014). Wen et al. (2010) first  
135 analyzed the  $d\text{-excess}_{\text{vap}}$  (denotes the d-excess of water vapor) at hourly temporal  
136 resolution in Beijing, China, and systematically discussed the controls on the isotopic  
137 exchange between vapor and condensed phase. Griffis et al. (2016) used multi-years



138 water vapor and precipitation isotopic results to evaluate the water vapor contributions  
139 to the planetary boundary layer from evaporation. Laskar et al. (2014) and Rangarajan  
140 et al. (2017) comprehensively investigated the water vapor sources and raindrop-vapor  
141 interaction in Taibei, and developed a box model to explain the controlling factors for  
142 high and low  $d\text{-excess}_{\text{vap}}$  events in this region. Combined with observations and  
143 numerical simulations of stable isotopes in vapor and rain impacted by cold fronts,  
144 Aemisegger et al. (2015) clearly revealed the importance of below-cloud processes for  
145 improving the simulations. As a creative work, Graf et al. (2019) introduced a new  
146 interpretive framework to directly separate the convoluted influences on the stable  
147 isotopic composition of vapor and precipitation according to the theoretical  
148 fractionation processes, especially the influences of equilibration and below-cloud  
149 evaporation, which enables us to correctly figure out the governing below-cloud  
150 processes in the course of a rainfall. Although Graf's et al. (2019) work gives us a new  
151 guideline to more accurately judge the raindrops experienced below-cloud evaporation  
152 effect, their work was only validated on a cold frontal rain event of short period, and  
153 hence more works should be done to prove the general applicability of their framework.

154

155 ~~On the other hand,~~ to quantitatively calculate the below-cloud evaporation ratio of  
156 raindrops, the falling raindrop model suggested by Stewart (1975) has been widely  
157 used, as the raindrops experienced physical processes have been explicitly described  
158 by this isotope-evaporation model (Müller et al., 2017; Sun et al., 2020; Zhao et al.,  
159 2019). Based on Stewart's (1975) work, the remaining fraction of raindrop mass ( $F_r$ )  
160 after evaporation could be calculated according to the difference of stable isotopic  
161 ratios in collected precipitation near the ground and below the cloud base (See Data  
162 and Methods, section 2.3.2, eq 7). We note that some of the studies used the mass  
163 conservation model of a falling raindrop to calculate  $F_r$  (See Data and Methods, section  
164 2.3.3, eq 8; Kong et al., 2013; Li et al., 2016; Sun et al., 2019; Wang et al., 2016b),  
165 and some of the works assumed the  $F_r$  is a constant (Müller et al., 2017), but no work  
166 has been reported by using ground-based and cloud-based observations of water  
167 vapor isotopes to calculate the  $F_r$  according to our knowledge. Due to the numerous  
168 uncertainty of the parameters in the mass conservation model, such as the factors of  
169 terminal velocity, the evaporation intensity, and the diameter of the raindrops, the error  
170 propagation will largely raise the deviation of  $F_r$  in the model. Furthermore, no work  
171 has systematically evaluated the differences of  $F_r$  computed by the observed isotope  
172 results and the classical mass conservation model, ~~until now.~~

173



174 Here, we have measured the near-ground water vapor isotopic composition at a city  
175 located in the CLP for 2 years, while collected 142 precipitation samples (including  
176 snowfall samples). The objectives of this study are to: 1. test the applicability of the  $\Delta$   
177  $d\Delta\delta$ -diagram suggested by Graf et al. (2019) when it is used to diagnose the below-  
178 cloud processes; 2. compare the differences of raindrops below-cloud evaporation  
179 ratio calculated by the observed ground-based water vapor isotopic composition and  
180 the mass conservation model; 3. understand the main meteorological factors, such as  
181 temperature, relative humidity (RH), and precipitation amount, controlling on the  
182 below-cloud evaporation effect, and the seasonal variations of below-cloud  
183 evaporation ratio in CLP. With the advantages of the coupling observations of the  
184 vapor and precipitation in stable isotopes near the ground level, this study will provide  
185 a new set of methods to determine the below-cloud evaporation effect qualitatively,  
186 and strengthen our insight into that effect in arid and semi-arid areas quantitatively.

187

## 188 2 Data and methods

### 189 2.1 Sampling site

190 As the capital city of Shaanxi province and the largest city in northwest China, Xi'an is  
191 located on the Guanzhong Plain on the southern edge of the CLP at an average  
192 elevation of 400 m. The city is located in a semi-arid to arid region and is representative  
193 of most cities in the north and northwest of China (e.g., Lanzhou and Xining city, Fig.  
194 1), while notable below-cloud evaporation effect has been reported by many studies in  
195 this area (Sun et al., 2020; Wan et al., 2018; Zhu et al., 2016).

196

197

198

199

200

201

202

203

204

205

206

207

208



209  
210

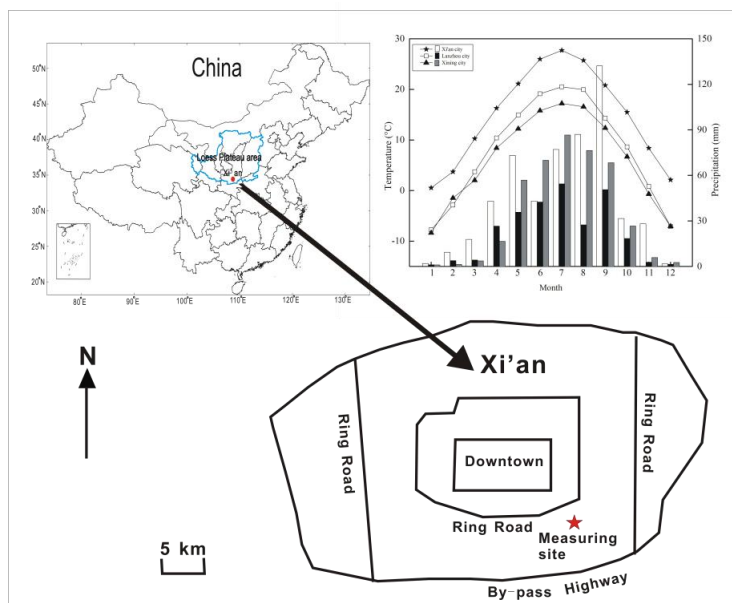

211 Figure 1 Average monthly variations of temperature and precipitation in Xi'an, Lanzhou, and  
212 Xining during 2010-2015. Location of the sampling site in the Yanta Zone, 9 km SE of downtown  
213 Xi'an. Water vapor samples are taken on the seventh floor of a twelve-story building, about 30  
214 m above ground level. Precipitation samples are collected on the top floor, 1 m above ground  
215 level.

216

217 The water vapor in-situ measurement is located in a residential area, approximately 10  
218 km southeast to downtown of Xi'an city (Fig. 1). No specific pollution sources or point  
219 sources are adjacent to the site. The atmospheric water vapor isotopic composition  
220 was observed from 1 January 2016 to 31 December 2017 on the seventh floor of the  
221 Institute of Earth and Environment, Chinese Academy of Sciences, about 30 m above  
222 ground level. The rainfall or snowfall collector was placed on the rooftop of the  
223 buildings (1 m above the floor of the roof).

224

## 225 2.2 Sampling and isotopic measurement

226 Rainfall and snowfall samples were collected manually from the beginning of each  
227 precipitation event using a polyethylene collector (700 mm × 450 mm × 170 mm) and  
228 the volume was measured using a graduated flask. Before being used, the collector  
229 was cleaned with soap and water, rinsed with deionized water, and then dried. When  
230 the precipitation events end, the collector was quickly taken back to minimize water  
231 evaporation. Rainfall samples were immediately poured into a 100 ml polyethylene  
232 bottle. The snowfall samples were melted at room temperature in a closed plastic bag  
233 after collection, and then immediately poured into a 100 ml polyethylene bottle. After



234 collection, samples were filtered through 0.40- $\mu\text{m}$  polycarbonate membranes. About  
235 a 2 ml of each filtrate was transferred into a sample vial, and stored at  $-4^{\circ}\text{C}$  until being  
236 measured. Of the 142 samples, during the two-year sampling campaign, we collected  
237 131 rainfall and 11 snowfall samples (Table S1).

238

239 In all cases, the data are reported in the standard delta notation ( $\delta$ ), i.e., the per mil  
240 ( $\text{‰}$ ) deviation from Vienna Standard Mean Ocean Water according to,  $\delta =$   
241  $(R_{\text{sample}}/R_{\text{reference}} - 1) \times 1000$ , where R is the isotope ratio of the heavy and light isotope  
242 (e.g.,  $^{18}\text{O}/^{16}\text{O}$ ) in the sample and the reference.

243

244 The precipitation samples were measured by Picarro L2130-i wavelength-scanned  
245 cavity ring-down spectrometer at high-precision model, with the precision of better than  
246 0.1 $\text{‰}$  and 0.5 $\text{‰}$  for  $\delta^{18}\text{O}$  and  $\delta^2\text{H}$ , respectively (Crosson, 2008; Gupta et al., 2009). All  
247 the samples were calibrated by three laboratory standards, while the  $\delta^{18}\text{O}$  and  $\delta^2\text{H}$  true  
248 values of the three laboratory standards (Laboratory Standard-1 (LS-1):  $\delta^{18}\text{O} = +0.3\text{‰}$ ,  
249  $\delta^2\text{H} = -0.4\text{‰}$ ; Laboratory Standard-2 (LS-2):  $\delta^{18}\text{O} = -8.8\text{‰}$ ,  $\delta^2\text{H} = -64.8\text{‰}$ ; Laboratory  
250 Standard-3 (LS-3):  $\delta^{18}\text{O} = -24.5\text{‰}$ ,  $\delta^2\text{H} = -189.1\text{‰}$ ) are calibrated to the scale of two  
251 international standard material VSMOW-GISP.

252

253 Atmospheric water vapor  $\delta^{18}\text{O}_v$  and  $\delta^2\text{H}_v$  were also measured by Picarro L2130-i, but  
254 at a liquid-vapor dual model. The inlet of the gas-phase instrument is connected to the  
255 vapor source through an external solenoid valve when measuring vapor samples. This  
256 valve can switch the input of the instrument from the vapor sample to dry gas. The  
257 instrument is connected to dry gas prior to being connected to the evaporator for  
258 measuring liquid water standards so that any traces of the water vapor sample are  
259 removed from the measurement cell. The standards are injected into the evaporator  
260 and measured by a CTC Analytics autosampler, PAL HTC-xt (Leap Technologies,  
261 Carrboro, NC, USA). The atmospheric water vapor is pumped through a stainless-steel  
262 tube (1/8 inch) using a diaphragm pump and detected by the laser spectrometer.

263

264 The raw water vapor  $\delta^{18}\text{O}_v$  and  $\delta^2\text{H}_v$  data were obtained approximately at 1 Hz and  
265 then block-averaged into 24 h intervals. As the main usage of this instrument is to  
266 measure the liquid water samples in our laboratory, it is used to monitor the water  
267 vapor isotopes in its spare time. Thus, the data gaps represent the instrument is in  
268 liquid samples measuring status or maintenance.

269





270 The hourly meteorological data, such as temperature and RH in Xi'an, are reported by  
271 the China meteorological administration, and can be downloaded from the websites of  
272 <http://www.weather.com.cn/>. The meteorological station is about 10 km to the north of  
273 our sampling site.

274

### 275 **2.3 Water vapor isotopic data calibration**

276 Due to the isotopic measurements of the cavity ringdown spectrometer with water  
277 vapor concentration effect as outlined by some studies (Bastrikov et al., 2014; Benetti  
278 et al., 2014; Steen-Larsen et al., 2013), it is important to determine the humidity-isotope  
279 calibration response function. Because we did not have the Standards Delivery Module  
280 (Picarro) system or equivalent, the humidity calibration is based on data obtained from  
281 discrete injections of three known liquid standards with a PAL autosampler and the  
282 Picarro vaporizer unit (Benetti et al., 2014; Noone et al., 2013). The analyzer is  
283 programmed to perform a self-calibration after every 24 hours of ambient air  
284 measurement using an autosampler to inject liquid standards for producing different  
285 humidity. Injections were arranged at humidity levels near 3000, 5000, 8000, 10000,  
286 15000, 20000, 25000 and 30000 ppm. Each reference sample is measured  
287 continuously for 8 times at one humidity level, and the last 3 times results were used  
288 to calculate the average to be recognized as the  $\delta$ -value at the measured humidity.  
289 The humidity correction is the difference between the  $\delta$ -value at the measurement  
290 humidity and the  $\delta$ -value at a reference value taken as humidity = 20000 ppm. The  
291 best fit was reached with an exponential function for  $\delta^{18}\text{O}_v$  and a linear function for  $\delta^2\text{H}_v$   
292 (Fig. S1a and S1b). The isotopic measurements of ambient air  $\delta^{18}\text{O}_v$  samples were  
293 corrected for humidity effects using:

$$294 \delta^{18}\text{O}_{\text{humidity calibration}} = \delta^{18}\text{O}_{\text{measured}} - (-4.91 \times e^{(-3.51 \times \text{Measured humidity})}) \quad (\text{eq 1})$$

295 and for ambient air  $\delta^2\text{H}_v$  humidity correction using:

$$296 \delta^2\text{H}_{\text{humidity calibration}} = \delta^2\text{H}_{\text{measured}} - (0.0001 \times \text{Measured humidity} - 1.86) \quad (\text{eq 2})$$

297 where  $\delta_{\text{humidity calibration}}$  is the calibrated data for water vapor stable isotope;  $\delta_{\text{measured}}$  is  
298 the raw, measured data before calibration; and measured humidity is the  
299 **corresponding humidity at the time of measurement.**

300

## 301 **2.4 Analytical methods**

### 302 **2.3.1 $\Delta d\Delta\delta$ -diagram**

303 As the raindrop **falling** from the cloud base to the ground, part of it **will be evaporated**  
304 into the ambient atmosphere, **however,** it is very hard to quantify this process by  
305 observation. Using stable water isotopes, Graf et al. (2019) introduced a  $\Delta d\Delta\delta$ -

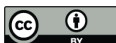

306 diagram to diagnose below-cloud processes and their effects on the isotopic  
307 composition of vapor and rain since equilibration and evaporation are two various  
308 below-cloud processes and lead to different directions in the two-dimensional phase  
309 space of the  $\Delta d\Delta\delta$ -diagram. Here, the differences of isotopic composition ( $\delta^{18}\text{O}_{\text{pv-eq}}$ ,  
310  $d\text{-excess}_{\text{pv-eq}}$ ) of equilibrium vapor from precipitation samples relative to the observed  
311 ground-based water vapor ( $\delta^{18}\text{O}_{\text{gr-v}}$ ,  $d\text{-excess}_{\text{gr-v}}$ ) can be expressed as:

$$312 \quad \Delta\delta = \delta_{\text{pv-eq}} - \delta_{\text{gr-v}} \quad (\text{eq3})$$

$$313 \quad \Delta d\text{-excess}_v = d\text{-excess}_{\text{pv-eq}} - d\text{-excess}_{\text{gr-v}} \quad (\text{eq4})$$

314 where  $\delta_{\text{pv-eq}}$  and  $\delta_{\text{gr-v}}$  are the  $\delta^2\text{H}$  ( $\delta^{18}\text{O}$ ) of water vapor below the cloud base and near  
315 the ground, respectively, and  $d\text{-excess}_{\text{pv-eq}}$  and  $d\text{-excess}_{\text{gr-v}}$  are  $d\text{-excess}$  values of  
316 water vapor below the cloud base and near the ground, respectively.

317

318 To calculate the water vapor isotopic composition below the cloud base, we  
319 hypothesize the constant exchange of water molecules between the liquid the vapor  
320 phases during the falling of raindrop, and the isotopic compositions reach towards an  
321 equilibrium in the two phases during the processes. In the equilibrium state, the  
322 isotopic fractionation between the liquid and vapor phases follows a temperature-  
323 dependent factor:

$$324 \quad R_p = R_{\text{pv-eq}} \alpha \quad (\text{eq5})$$

325 where  $R_{\text{pv-eq}}$  is the water vapor isotope ratio between heavy and light isotopes ( $^2\text{H}/^1\text{H}$   
326 and  $^{18}\text{O}/^{16}\text{O}$ ),  $R_p$  is the isotope ratio in precipitation, and  $\alpha$  is a temperature-dependent  
327 equilibrium fractionation factor. Here, when the temperature is greater than  $0^\circ\text{C}$ , we  
328 use the equation of Horita and Wesolowski (1994) to calculate  $^2\alpha$  and  $^{18}\alpha$ , when the  
329 temperature is below  $0^\circ\text{C}$ , the equilibrium fractionation factor suggested by Ellehoj et  
330 al. (2013) is considered.

331

332 The above equation can be converted into  $\delta$ -notation as:

$$333 \quad \frac{\delta_p}{1000} + 1 = \alpha \left( \frac{\delta_{\text{pv-eq}}}{1000} + 1 \right) \quad (\text{eq6})$$

334 where  $\delta_p$  is the isotope ratio in precipitation.

335

### 336 2.3.2 Below-cloud evaporation calculated by isotope

337 Stewart (1975) suggested the falling raindrop isotopic fractionation of evaporation  
338 could be calculated according to the fraction of raindrop mass remained after  
339 evaporation:



$$\Delta\delta = \delta_p - \delta_{zp-eq} = \left(1 - \frac{\gamma}{\alpha}\right)(F_{iso}^{\beta} - 1) \quad (\text{eq7})$$

341 where  $\delta_p$  and  $\delta_{zp-eq}$  are precipitation isotope ratio near the ground and below the cloud  
342 base, respectively;  $F_{iso}$  is the remaining fraction of raindrop mass after evaporation  
343 (hereafter, the remaining fraction of raindrop mass calculated by this method is  
344 denoted as  $F_{iso}$ );  $\alpha$  is equilibrium fractionation factor for hydrogen and oxygen isotopes;  
345 the parameters of  $\gamma$  and  $\beta$  is defined by Stewart (1975). For the detailed calculation  
346 processes, please refer to the supplemental material (Appendix A), and Wang et al.  
347 (2016b), Sun et al. (2020), and Salamalikis (2016).

348

### 349 2.3.3 Below-cloud evaporation calculated by mass conservation model

350 Before the advent of the laser-based spectrometer, the method, which calculates the  
351 remaining fraction of raindrop mass according to the law of conservation of mass  
352 (hereafter, the remaining fraction of raindrop mass calculated by this method is  
353 denoted as  $F_{raindrop}$ ), has been widely used (Kong et al., 2013; Li et al., 2016a; Sun et al.,  
354 2020; Wang et al., 2016b; Zhao et al., 2019):

$$F_{raindrop} = \frac{m_{end}}{m_{end} + m_{ev}} \quad (\text{eq8})$$

356 where the mass of the reaching ground raindrop without evaporation is  $m_{end}$  and the  
357 evaporated raindrop mass is  $m_{ev}$ . For the detailed calculation processes, please refer  
358 to the supplemental material (Appendix B), and Wang et al. (2016b), Sun et al. (2020),  
359 Kong et al. (2013), and Salamalikis (2016).

360

### 361 2.3.4 Statistical Analysis

362 To compare the difference of the below-cloud evaporation calculated by the two  
363 methods, the independent t-test was performed on SPSS 13.0 (SPSS Inc., Chicago,  
364 US). A significant statistical difference was set at  $p < 0.05$ .

365

## 366 3 Results and discussion

### 367 3.1 Relationship between water vapor and precipitation isotope ratios

368 In this study, the local meteoric water line (LMWL) is:  $\delta^2H_p = 7.0 \times \delta^{18}O_p + 3.0$  based on  
369 event-based precipitation isotopic composition, and the local water vapor line (LWVL)  
370 is:  $\delta^2H_v = 7.6 \times \delta^{18}O_v + 10.0$  based on daily water vapor isotopic composition (Fig. 2). Both  
371 the slope and intercept of LMWL are lower than that of Global Meteoric Water Line  
372 (GMWL), which are 8.0 and 10.0 (Dansgaard, 1964; Gat, 1996), respectively,  
373 indicating the potential for significant below-cloud evaporation effect on precipitation  
374 (Froehlich et al., 2008). In general, the slope of the meteoric water lines are indicative



375 of kinetic processes superimposed on the equilibrium fractionation, and the slope of  
376 LWVL (slope=7.6) that shows a little lower than that of expected equilibrium  
377 fractionation (slope=8.0) is also associated with the increasing influence of kinetic  
378 processes (Rangarajan et al., 2017).

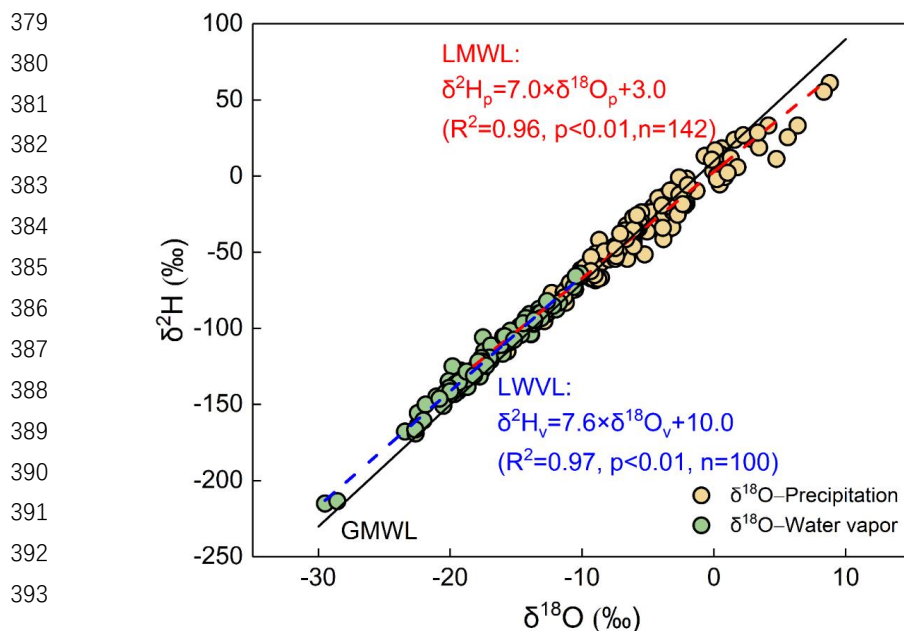

394 **Figure 2** Local meteoric water line (LMWL) and Local water vapor line (LWVL) in Xi'an

395

396 Besides, we noted that the water vapor and precipitation isotopic composition basically  
397 followed the same trend, and the water vapor isotopic composition is roughly more  
398 negative than the precipitation isotopic composition (Fig. 2). According to the classical  
399 isotopic fractionation theory, the heavier isotopes preferentially condense into the  
400 liquid phase, and results in the precipitation isotopic ratios being more positive than  
401 the corresponding water vapor isotopic composition during the precipitation process  
402 (Dansgaard, 1964). Hence, the perfect distribution characteristics of water vapor and  
403 precipitation on the  $\delta^{18}\text{O}$ - $\delta^2\text{H}$  plot would make us suppose that the precipitation isotopic  
404 composition is mainly determined by its local water vapor isotopic composition in this  
405 study site. To further validate our assumption, each of the event-based precipitation  
406 isotopic ratio was plotted together with its water vapor isotopic composition of the  
407 corresponding day, and they showed a significant positive correlation (Fig. 3a,  $R^2 = 0.66$ ,  
408  $p < 0.01$ ). The water vapor isotopic composition can explain above 60% of the variation  
409 of precipitation isotopic composition. Further, we used the measured precipitation  
410 isotopic composition to deduce the water vapor isotopic composition at the cloud base



411 (1500m) according to the liquid-vapor equilibrium isotope fractionation, and compared  
412 it with the observed near-ground water vapor isotopic composition. As expected, the  
413 scatterplot of the observed  $\delta^{18}\text{O}_v$  against the deduced  $\delta^{18}\text{O}_{v\text{-eq}(1500\text{m})}$  also presented a  
414 significantly positive relationship, and the correlation coefficient increased a little as  
415 well (Fig. 3b).

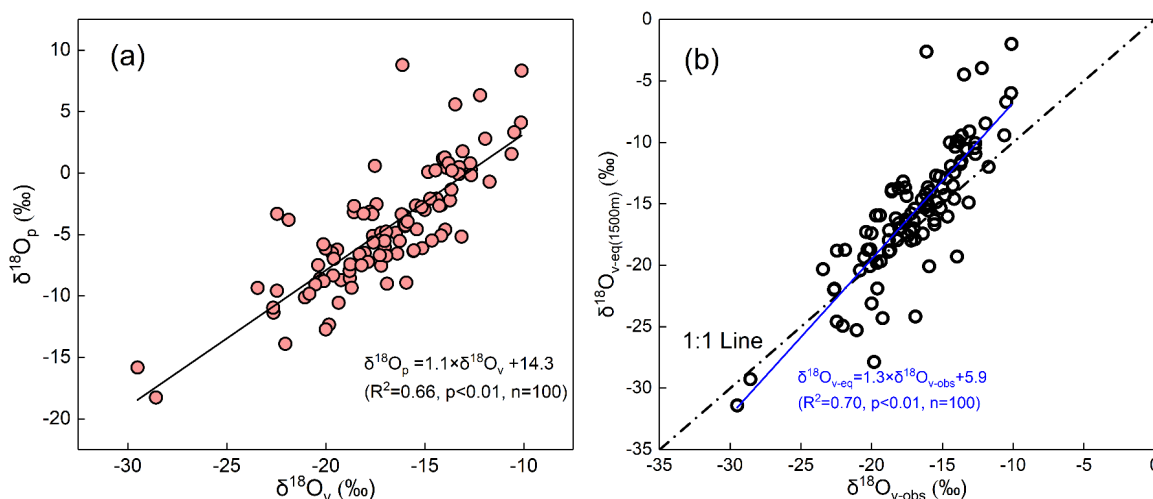

416 Figure 3 Relationship between  $\delta^{18}\text{O}_p$  of precipitation and  $\delta^{18}\text{O}_v$  of water vapor in Xian (a); and  
417 relationship between the equilibrium computed 1500m  $\delta^{18}\text{O}_v$  based on the precipitation isotopic  
418 composition and the near ground observed  $\delta^{18}\text{O}_v$  (b). The dash-dot line in (b) stands for the 1:1  
419 line, and the blue line represents the regression line of the data.

420

421 The reasonable agreement of  $\delta^{18}\text{O}$  between observed water vapor and equilibrium  
422 prediction has been reported by Jacob and Sonntag (1991), Welp et al. (2008), and  
423 Wen et al. (2010), however, they postulated the different relationship underlying the  
424  $\delta^{18}\text{O}_v$  and  $\delta^{18}\text{O}_{p\text{-v-eq}}$ . Jacob and Sonntag (1991) suggested that the water vapor isotopic  
425 composition is possible to be deduced from the corresponding precipitation isotopic  
426 composition, but Wen et al. (2010) pointed that the equilibrium method cannot  
427 accurately predict the ground-level water vapor isotopic composition in arid and  
428 semiarid climates. Here, our results indicate that it is possible to derive the isotope  
429 composition of atmospheric water vapor based on that of the precipitation in the semi-  
430 arid area.

431

432 In addition, we also noted that the equilibrium calculated  $\delta^{18}\text{O}_{v\text{-eq}(1500\text{m})}$  is relatively more  
433 positive than the  $\delta^{18}\text{O}_{v\text{-obs}}$  (Fig. 3b). Conventionally, the water vapor isotopic  
434 composition decreases with the increase of altitude because of the decreasing  
435 temperature (Deshpande et al., 2010; Salmon et al., 2019). However, due to the CLP



436 belonging to the semi-arid area, the raindrops are largely potential to be evaporated in  
437 the unsaturated atmosphere during their falling as well as the  $\delta^{18}\text{O}_p$  is subject to more  
438 positive than its actual value. Therefore, the positively equilibrated  $\delta^{18}\text{O}_{v\text{-eq}(1500\text{m})}$  is  
439 caused by the below-cloud evaporation effect, which makes the  $\delta^{18}\text{O}_{v\text{-eq}}-\delta^{18}\text{O}_{v\text{-obs}}$  points  
440 deviate from the 1:1 line. This reminds us that although the isotopic composition of  
441 water vapor can be derived from the precipitation, the below-cloud evaporation effect  
442 on altering the precipitation isotopic composition should be carefully noticed in the arid  
443 and semi-arid area.

444

### 445 3.2 Below-cloud processes indicated by $\Delta d$ $\Delta\delta$ -diagram

446 Traditionally, to qualitatively assess the below-cloud evaporation of raindrop, the value  
447 of  $d\text{-excess}_p$  is a benchmark, as the isotopically kinetic fractionation will cause  $d\text{-excess}_p$   
448 deviate from 10‰, which is a theoretical value under vapor-liquid equilibrium  
449 fractionation (Gat, 1996). Normally, below-cloud evaporation will move  $d\text{-excess}_p$   
450 below 10‰, and in comparison, mixing with the recycled water vapor from surface  
451 evaporation and plant transpiration will bring  $d\text{-excess}_p$  above 10‰ (Craig, 1961;  
452 Dansgaard, 1964). However, considering the kinetic fractionation processes of  
453 moisture transportation, the  $d\text{-excess}_p$  information recorded in the collected  
454 precipitation has been modified, and thus this enhances the uncertainty to gauge the  
455 below-cloud evaporation process by solely using  $d\text{-excess}_p$ . Moreover, it is unable to  
456 discern other below-cloud processes only based on  $d\text{-excess}_p$ . In contrast, the  $\Delta d$  and  
457  $\Delta\delta$  diagram referred by Graf et al. (2019) provides richer information on the below-  
458 cloud processes.

459

460 By projecting our data on the  $\Delta d$  and  $\Delta\delta$  plot, the evaporation, equilibration, and non-  
461 exchange processes could be clearly differentiated (Fig. 4). It is apparent from Fig. 4,  
462 most of the precipitation samples are located in the fourth quadrant, indicating that  
463 evaporation is the dominant below-cloud process. A small part of samples is distributed  
464 in the first and second quadrant, and their  $\Delta\delta$  are close to 0‰ while  $\Delta d$  are little higher  
465 than 0‰. This cluster of samples implies that the below-cloud evaporation and cloud-  
466 based isotopic fractionation tend to achieve a complete equilibrium state. Interestingly,  
467 in our samples, most of the snow samples seize the third quadrant, which is suggestive  
468 of below-cloud evaporation with less impact on them, and their initial signal after cloud-  
469 based equilibrium fractionation is well retained. According to results from numerical  
470 simulations and in-situ observations, Graf et al. (2019) summarized that raindrop size



471 and precipitation intensity appear to be the important driving factors of the below-cloud  
472 processes, because raindrops with large diameter and high intensity will reduce its  
473 residence time in the atmospheric column, and lower the evaporation possibility during  
474 its way down toward the ground surface. However, as for snowfall events, it seems  
475 unreasonable to explain the strongly negative  $\Delta\delta$  from through the drop size and rain  
476 rate (Fig. 4). It is well known that snowfall events generally happen in low-temperature  
477 conditions, and corresponding to weak evaporation. Hence, rain/snow formed under  
478 such circumstances, its isotopic signals will not be largely changed by the  
479 environmental factors during its falling, which leads the  $\Delta\delta$  to be more negative with  
480 the decrease of temperature, such as the phenomenon observed in Graf's et al. (2019)  
481 study during the post-frontal periods. Our results suggest that except for drop size and  
482 rain rate, precipitation type is also an essential factor that needs to be fully considered  
483 in the below-cloud processes.

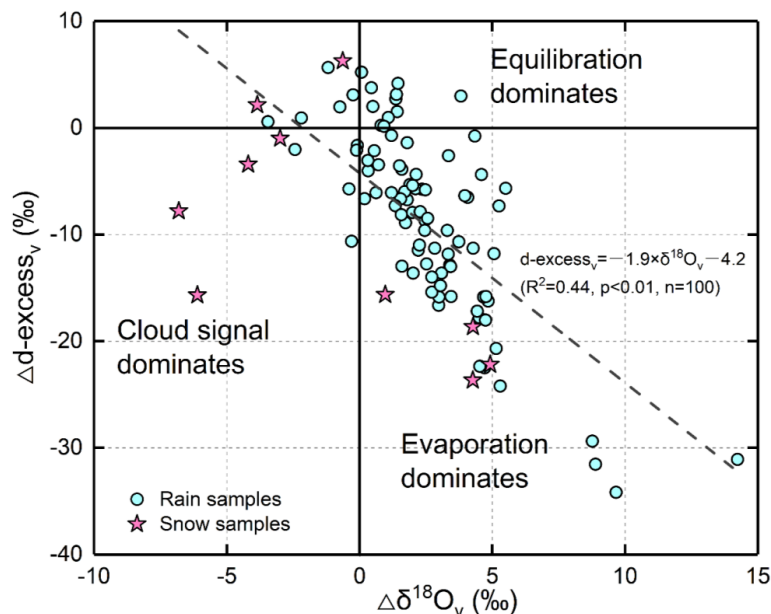

499 **Figure 4** The projection of our data on Graf et al. (2019) suggested  $\Delta d\Delta\delta$ -diagram. The solid  
500 lines stand for  $\Delta d\text{-excess}_v$  and  $\Delta\delta^{18}\text{O}_v$  of 0‰. The dashed line corresponds to the linear fit  
501 through the samples.

502

503 Meteorological factors, such as precipitation amount, temperature, and RH, are the  
504 main factors affecting below-cloud evaporation (Li et al., 2016b; Peng et al., 2007),  
505 and have been well studied by combined with precipitation  $d\text{-excess}_p$  (Ma et al., 2014;  
506 Wang et al., 2016b). In order to further analyze the below-cloud processes, we added



507 the meteorological and isotopic information on the  $\Delta d\Delta\delta$ -diagram (Fig. 5). Generally,  
508 with regard to high  $\Delta^{18}\text{O}_v$  samples, the corresponding meteorological condition is high  
509 temperature, low precipitation amount, and low RH (Fig. 5a-c). In contrast, under a  
510 condition of low air temperature, high RH, and large precipitation amount, the  $\Delta^{18}\text{O}_v$   
511 of samples are relatively more negative (Fig. 5a-c). As below-cloud processes are  
512 controlled by multi-variable factors, it is hard to only use one physical variable to  
513 explain the below-cloud evaporation (Ma et al., 2014; Wang et al., 2016b). For example,  
514 under the highest temperature condition (two most red dots in Fig. 5a), the below-cloud  
515 evaporation effect should be higher, and cause  $\Delta^{18}\text{O}_v$  to be more positive and  $\Delta d$ -  
516  $\text{excess}_v$  to be more negative. However, under such circumstances, both the  $\Delta^{18}\text{O}_v$  and  
517  $\Delta d\text{-excess}_v$  of the two samples are close to 0%. By considering the precipitation  
518 amount, the two samples collected under the highest temperature condition are  
519 associate with a relatively larger precipitation amount which will temper the intensity of  
520 below-cloud evaporation. Similarly, the samples with lower precipitation amount is  
521 associate with high RH, and cause the  $\Delta^{18}\text{O}_v$  distributed around 3%. For the snow  
522 samples, the data with positive  $\Delta^{18}\text{O}_v$  is regarding to the very low RH (Fig. 5c).



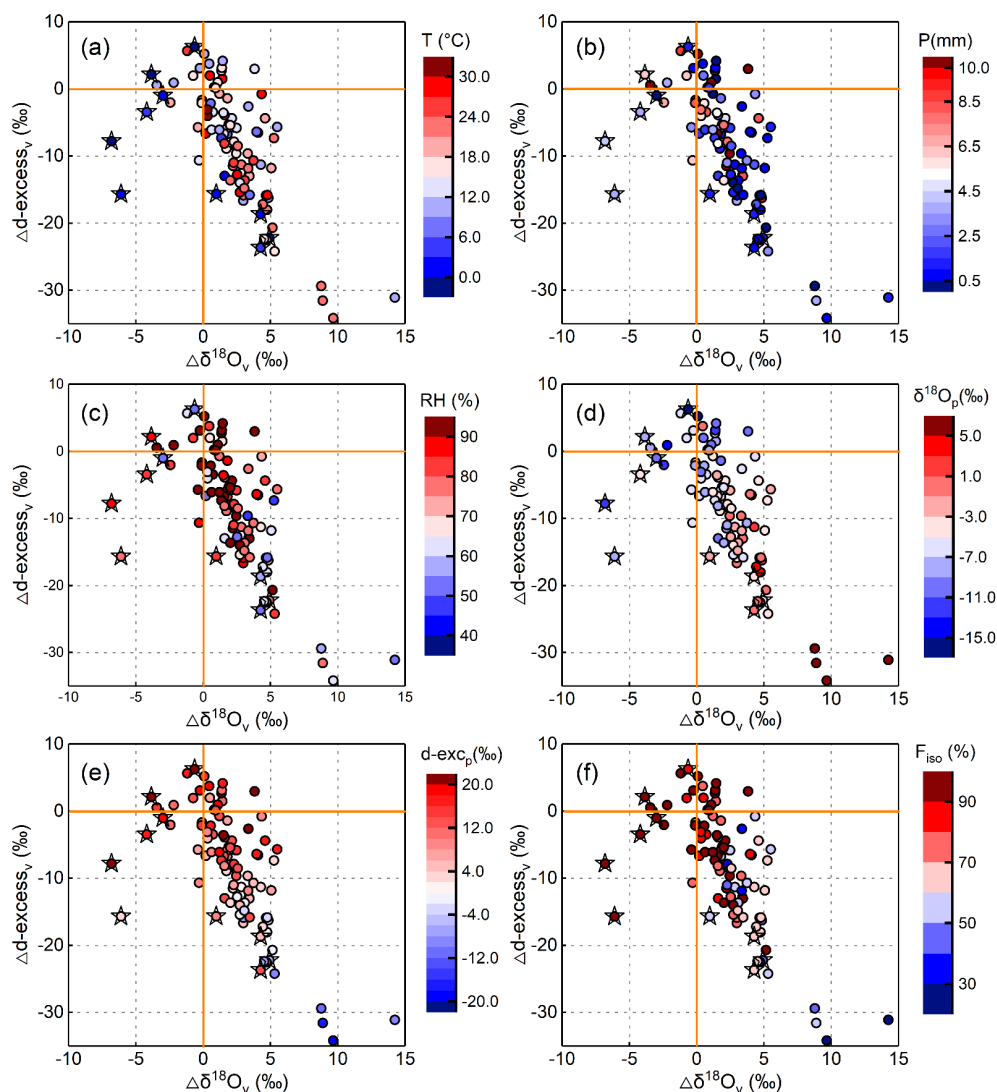

523 Figure 5  $\Delta d \Delta \delta$ -diagram for the precipitation samples with meteorological factors and  
524 precipitation isotopic information. Temperature (a); Precipitation amount (b); Relative humidity  
525 (c);  $\delta^{18}\text{O}_p$  of precipitation (d);  $d\text{-exc}_p$  of precipitation (e); Remaining fraction of evaporation  
526 (f). The dots with a star represent the snow samples.

527

528 In contrast to meteorological factors, the pattern of precipitation isotopic composition  
529 distribution on the  $\Delta d \Delta \delta$ -diagram is more clear. Under the high below-cloud  
530 evaporation condition, the  $\delta^{18}\text{O}_p$  is more positive and  $d\text{-exc}_p$  is relatively negative  
531 (Fig. 5d and 5e). Correspondingly, the differences between equilibrated  $\delta^{18}\text{O}_{\text{eq-v}}$ ,  $d\text{-exc}_{\text{eq-v}}$   
532 and observed  $\delta^{18}\text{O}_{\text{gr-v}}$ ,  $d\text{-exc}_{\text{gr-v}}$  are larger. Conversely, under low below-



533 cloud evaporation conditions, mainly corresponding to the most snow samples, we  
534 could see the lowest  $\delta^{18}\text{O}_p$  and highest d-excess<sub>p</sub> samples, respectively (Fig. 5d and  
535 5e). Moreover, the  $\Delta^{18}\text{O}_v$  is lower than 0‰ and  $\Delta\text{d-excess}_v$  is placed around 0‰.  
536 Basically, the  $\Delta\text{d}/\Delta\delta$ -diagram follows the traditional explanation, and provides more  
537 information, such as the cloud signals, equilibrium conditions, to the falling raindrops.  
538  
539 By contrast, the slope of the regression line of  $\Delta\text{d}/\Delta\delta$  is  $-1.9$  in our study (Fig. 4),  
540 which is more negative than result shown by Graf's et al. (2019). According to the  
541 sensitivity test by Graf et al. (2019), RH has a considerable impact on the slope of  $\Delta$   
542  $\text{d}/\Delta\delta$ . As our sampling site is located in a semi-arid area and Graf's et al. (2019)  
543 location is in the zone of a temperate marine climate, the different slope in two sites  
544 may be caused by the differences in RH. Therefore, the  $\Delta\text{d}/\Delta\delta$  slope of  $-1.9$  is  
545 possible to be related to the arid or semi-arid conditions, and  $\Delta\text{d}/\Delta\delta$  slope of  $-0.3$   
546 could represent a general characteristic of rainfall for continental mid-latitude cold front  
547 passages. Certainly, to explore the relationship between the slope of  $\Delta\text{d}/\Delta\delta$  and the  
548 climatic characteristic, more validation works need to be done in the future studies.

549

### 550 3.3 Comparing and analyzing the differences between $F_{\text{iso}}$ and $F_{\text{raindrop}}$

#### 551 3.3.1 The differences and reasons

552 In 1975, Stewart (1975) presented a set of empirical models, which is still widely used,  
553 to evaluate the below-cloud evaporation rate of the falling raindrop. However, being  
554 limited by measuring the cloud-based isotopic composition of the raindrop, many  
555 studies turn to use mass conservation model to evaluate the evaporation rate of the  
556 raindrop during its falling (Kong et al., 2013; Li et al., 2016a; Sun et al., 2020; Wang et  
557 al., 2016b). Here, to compare their differences, we used the isotopic method and mass  
558 conservation model, respectively, to calculate the  $F_r$  after the below-cloud evaporation.  
559

560 As shown in Fig. 6a, the mean of computed reaming fraction is 76.3% by the isotopic  
561 method ( $F_{\text{iso}}$ ), and 65.6% by the mass conservation model ( $F_{\text{raindrop}}$ ) based on two-year  
562 statistical results. The  $F_{\text{raindrop}}$  is statistically lower than the  $F_{\text{iso}}$  depending on the  
563 independent t-test ( $F=1.49$ ,  $p<0.01$ ). In addition, the  $F_{\text{iso}}$  and  $F_{\text{raindrop}}$  show an obvious  
564 difference, the  $F_{\text{iso}}$  and  $F_{\text{raindrop}}$  deviating from 1:1 line, when the  $F_{\text{iso}}$  equals to 60%~80%  
565 (Fig. 6b). On a seasonal scale, the difference between  $F_{\text{iso}}$  and  $F_{\text{raindrop}}$  in spring,  
566 summer, autumn, winter is 13.7%, 12.8%, 6.0%, and 25.0%, respectively, which is the



567 largest in winter, and the lowest in autumn (Fig. 7).

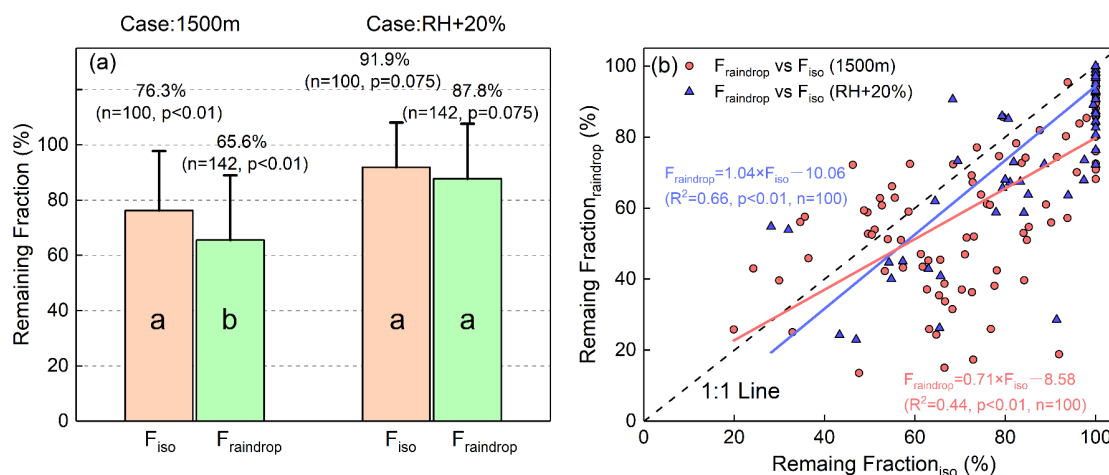

568 Figure 6 The comparison between the remaining fraction calculated by two methods. In (a), the  
 569 taupe bars and the abbreviation of  $F_{iso}$  represent the remaining fraction calculated by the  
 570 isotopic method, and the green bars and the abbreviation of  $F_{raindrop}$  represent the remaining  
 571 fraction calculated by the mass conservation method. Case 1500m denotes that the raindrops  
 572 evaporation calculation is based on the assumption of the cloud base at 1500m, and the  
 573 raindrops are formed at that altitude. Case RH+20% denotes that based on the condition of  
 574 case 1500m, we calculated the remaining fraction by increasing the ground observed RH by  
 575 20%. n represents the number of samples used in statistics. The a and b in the bars denote the  
 576 results of the independent t-test. In (b), the red dots represent the computed results of the  
 577 remaining fraction under case 1500m condition, and the blue triangles represent the computed  
 578 results under case RH+20% condition. The dash line is the 1:1 line.

579

580

581

582

583

584

585

586

587

588

589

590

591

592

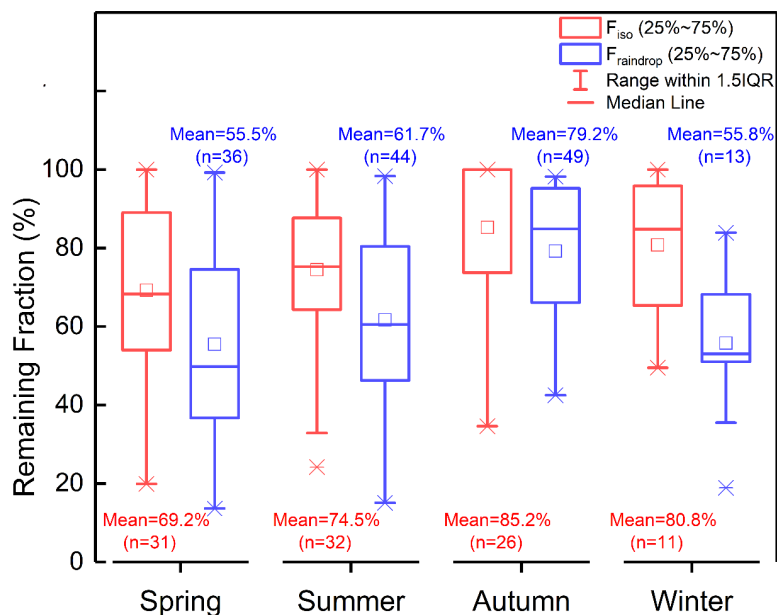

602 Figure 7 Comparison between the mean remaining fraction results calculated by two methods  
603 in four seasons. n represent the number of samples used in statistics.

604

605 To further explore the reason for the large differences by employing different methods,  
606 we performed the correlation analyses between meteorological factors and the  
607 remaining fraction of evaporation (Fig. S2). These analyses reveal that the most  
608 important impact factor both on  $F_{iso}$  and  $F_{raindrop}$  is RH (Fig. S2b). Although precipitation  
609 amount influences  $F_{iso}$  and  $F_{raindrop}$  as well, their relationship is non-linear, and its effect  
610 on  $F_{iso}$  is rather weak ( $R^2=0.16$ , Fig. S2c). For temperature, no clear correlation was  
611 found. Wang et al. (2016b) explicitly pointed that among the parameters of temperature,  
612 precipitation amount, RH, and raindrop diameter, RH generally plays a decisive role  
613 on the obtained  $\Delta d$ -excess, which is positively correlated with the remaining fraction  
614 of raindrop.

615

616 In order to analyze the underlying reason, first, we checked the equation used to  
617 calculate  $F_{iso}$  and  $F_{raindrop}$ . We noted that in both methods, RH is an important parameter  
618 to compute the remaining ratio. In the equation for computing  $F_{iso}$ , the values of  $\gamma$  and  
619  $\beta$  are highly dependent on RH. Equally, in the  $F_{raindrop}$  computing equation, RH will be  
620 the decisive factor of evaporation intensity (E). Then, we tested the sensitivity between  
621  $\Delta\delta^{18}O$  and RH under different  $F_{iso}$  levels (Fig. S3). Our results showed, under high RH  
622 condition (60%~90%), a little variation of  $\Delta\delta^{18}O$  corresponded to a wide range of  $F_{iso}$



623 distribution. We also noticed, under higher RH condition (above 90%), the simulated  
624  $\Delta \delta^{18}\text{O}$  is very small, normally lower than 0.5‰. However, in reality, the  $\Delta \delta^{18}\text{O}$  is  
625 generally greater than 0.5‰. Therefore, when the actual  $\Delta \delta^{18}\text{O}$  value is larger than  
626 the theoretical value, the calculated  $F_{\text{iso}}$  results will be larger than 100%, and this is in  
627 accordance with the actual condition. Because under higher RH condition, the raindrop  
628 evaporation ratio will decrease, and in turn the  $F_r$  will appropriately increase. Moreover,  
629 in the near-saturated air column, the raindrop is hardly evaporated.

630

631 Therefore, it is reasonable to assume that when the RH is higher, the difference  
632 between the  $F_{\text{iso}}$  and  $F_{\text{raindrop}}$  will be reduced. To validate our assumption, we computed  
633 the  $F_{\text{iso}}$  and  $F_{\text{raindrop}}$  by increasing RH by 20%, respectively. As expected, the mean  
634 annual difference was highly reduced, and statistically there is no significant difference  
635 (Fig. 6a, independent t-test,  $F=5.665$ ,  $p=0.075$ ). Moreover, the  $F_r$  computed by those  
636 two methods is closer to each other, while the correlation coefficient is highly increased,  
637 and the slope is closer to 1 (Fig. 6b). For the seasonal variations of  $F_r$ , the larger  
638 differences between  $F_{\text{iso}}$  and  $F_{\text{raindrop}}$  in spring and summer are regarding to the low RH  
639 in these seasons, while the small difference in autumn is related to the higher RH. For  
640 the largest difference in winter, it is most likely due to the fact that in the mass  
641 conservation model, the diameter of raindrop used to determine the terminal velocity  
642 of the raindrop ( $v_{\text{end}}$ ) and the evaporation intensity ( $E$ ) do not take snowfall factor into  
643 account resulting a great uncertainty in the calculation results.

644

### 645 3.3.2 Sensitivity test

646 In the below-cloud isotopic evaporation model (eq. 7), the two controlling factors are  
647 the equilibrium fractionation factor ( $\alpha$ ) and the RH. As the equilibrium fractionation  
648 factor varies with the cloud base altitude (mainly caused by the variation of  
649 temperature), we used the different altitudes to represent the variations of  $\alpha$ . In order  
650 to assess the relevance of different ambient conditions for the raindrop evaporation, a  
651 sensitivity test of  $F_r$  under different altitude and RH scenarios is exhibited in Fig. S4.  
652 With the increase of altitude, the  $F_r$  is gradually decreased. It is well known that with  
653 the increase of altitude, the raindrop falling distance will increase, and correspondingly  
654 the falling time will be extended. As a result, more fraction of raindrops would be  
655 evaporated in the unsaturated atmospheric columns. When the RH increases by 20%,  
656 the atmospheric columns is near saturated, and largely decrease the evaporation  
657 possibility of falling raindrops. Conversely, the decrease of RH will strongly increase  
658 the evaporation proportion of falling raindrops. In addition, according to Fig. S4, the  $F_r$



659 seems to be more sensitive to the changing of RH than that of altitude.

660

661 Overall, in our study, the mass conservation method will overestimate the raindrop  
662 evaporation ratios relative to the isotopic method. The overestimation may be related  
663 to the low RH in our studying location. If we increase the RH by 20%, there is no  
664 significant difference between the two methods. This indicates that in high RH areas,  
665 either method could be used to calculate the  $F_r$ . However, in those arid and semi-arid  
666 areas, where the RH is relatively low, and the high latitude regions, where snowfall is  
667 frequent in winter, we need to cautiously use the result computed by the mass  
668 conservation method. In the future, it will be promising to study the raindrop formation  
669 height and upper atmospheric water vapor isotopic composition when considering the  
670 below-cloud processes of raindrop.

671

### 672 3.4 The characteristics of below-cloud evaporation of raindrop in Xi'an

673 As the phenomenon of below-cloud evaporation is very common in arid and semi-arid  
674 regions, to explore the information contained in the precipitation isotopic composition,  
675 it is important to clearly know that how much of the raindrops have been evaporated  
676 before they land on the ground. Here, we summarized the seasonal variations of  $F_{iso}$   
677 in Xi'an (Fig. 8).

678

679

680

681

682

683

684

685

686

687

688

689

690

691

692

693

694

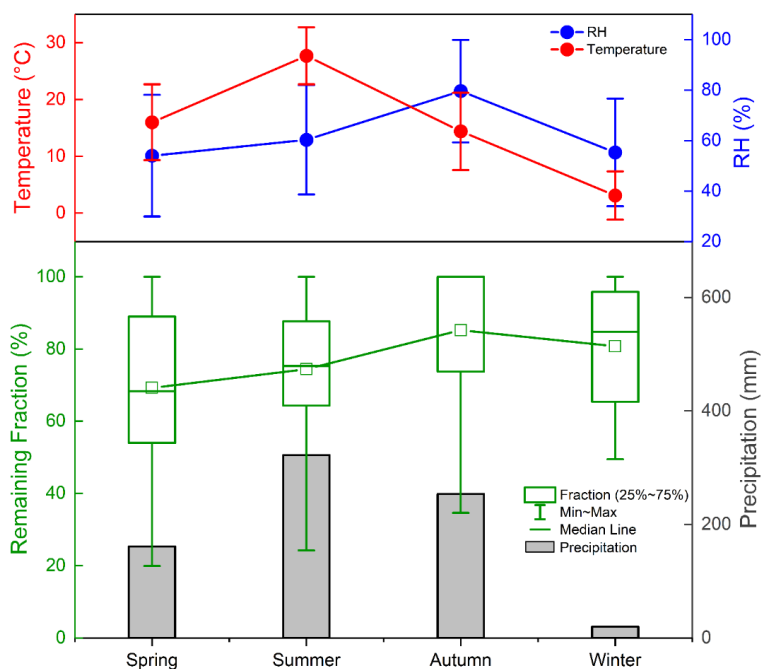



695 Figure 8 The variations of temperature, relative humidity, precipitation amount and mean  
696 remaining fraction of evaporated raindrops in four seasons in Xi'an

697

698 By seasonally dividing the precipitation isotopic composition on the  $\Delta d\Delta\delta$ -diagram, it  
699 showed that samples collected in spring and summer dominate the evaporation phase,  
700 reflecting a stronger evaporation influence, while most of the winter precipitation and  
701 part of autumn precipitation monopolize the cloud signal phase indicating a weak or  
702 no below-cloud evaporation on these samples (Fig. S5). In addition, part of the autumn  
703 samples, in which the below-cloud evaporation and cloud-based isotopic exchange  
704 tends to achieve a complete equilibrium state is distributed in the equilibration phase  
705 (Fig. S5). Moreover, the raindrops  $F_{iso}$  distribution on the  $\Delta d\Delta\delta$ -diagram is also  
706 related to the below-cloud processes (Fig. 5f).

707

708 The mean raindrop evaporation rate is highest in spring and lowest in autumn based  
709 on two-year data (Fig. 8). The seasonal variation of  $F_{iso}$  basically followed the trend of  
710 seasonal variation of RH. Although the precipitation amount is highest in the summer,  
711 the temperature is extremely high and RH is relatively low, which causes the high  
712 evaporation rate in summer. In winter, the low evaporation rate may be related to the  
713 precipitation type, because snowfall is the main deposition type in this season.

714

#### 715 **4 Conclusions**

716 The below-cloud processes acting on precipitation are complex and changeable,  
717 especially in the arid and semi-arid regions. Previously, using the slope of LMWL and  
718 d-excess of precipitation, we can only speculate the raindrops experienced below-  
719 cloud processes according to the relative change of precipitation isotopic composition.  
720 However, to display our data on the  $\Delta d\Delta\delta$ -diagram, which is suggested by Graf et al.  
721 (2019), we can more intuitively determine the happened below-cloud processes on the  
722 falling raindrops. The  $\Delta d\Delta\delta$ -diagram provides a new tool for us to qualitatively realize  
723 the below-cloud processes of raindrops.

724

725 In this study, based on the two-year precipitation data collected in Xi'an, we  
726 systematically analyze its below-cloud processes, and get the following main  
727 conclusions:

728 1. In Xi'an, the precipitation isotopic signals mainly record the information of water  
729 vapor isotopic composition, but the signals could be altered by the below-cloud  
730 evaporation effect. This remind us to be cautious to study the hydrological cycle and



731 climate changes by using precipitation isotopic signals in the arid and semi-arid regions.  
732 2. Our work validates the general applicability of the  $\Delta d/\Delta\delta$ -diagram. According to  $\Delta d$   
733  $\Delta\delta$ -diagram, the below-cloud evaporation is the main process during the raindrops  
734 falling. For the snowfall samples, they are less influenced by the below-cloud  
735 processes, and preserve its initial water vapor information. Hence, our results further  
736 strengthen the reliability by using ice-core to reconstruct the paleoclimate,  
737 paleoenvironment, and paleohydrology in the cold area. The different  $\Delta d/\Delta\delta$  slopes  
738 in our work and Graf's et al. (2019) study may represent the different climate conditions,  
739 and it will be more convincing to explore the slope for more climatic regions in future  
740 studies.

741 3. Compared with the isotopic method, the evaporation rate computed by the mass  
742 conservation model is overestimated. Relative humidity is the main controlling factor  
743 in computing the remaining fraction of raindrops below-cloud evaporation. Due to more  
744 undeterminable parameters in the mass conservation model, such as raindrop  
745 diameter, evaporation intensity, raindrop falling velocity, and no consideration of  
746 precipitation type, it is more suitable to use isotopic model to calculate the remaining  
747 fraction of evaporated raindrops.

748 4. In the semi-arid city of CLP, the evaporation rates are higher in spring and summer,  
749 and lower in autumn and winter, and this is related to the variation of local RH.

750

751

752

### 753 **Data availability**

754 The datasets can be obtained from the TableS1.

755

### 756 **Author contribution**

757 Meng Xing and Weiguo Liu designed the experiments, interpreted the results, and  
758 prepared the manuscript with contributions from all co-authors. Meng Xing and Jing  
759 Hu analyzed the precipitation and water vapor samples. Jing Hu maintained the  
760 experimental instruments.

761

### 762 **Competing interests**

763 The authors declare that they have no conflict of interest.

764

765





766 **Acknowledgment**

767 This work was supported by China haze formation mechanism research  
768 (SKLLQGZD1701), National Research Program for Key Issues in Air Pollution Control  
769 (DQGG0105-02), Science Foundation of China (No. 41303011), and China  
770 scholarship council. The authors would like to thank Mr. Xijing Cao for helping to collect  
771 precipitation samples.

772

773 **References**

- 774 Aemisegger, F., Sturm, P., Graf, P., Sodemann, H., Pfahl, S., Knohl, A. and Wernli, H.:  
775 Measuring variations of  $\delta$  18O and  $\delta$  2H in atmospheric water vapour using two commercial  
776 laser-based spectrometers: An instrument characterisation study, *Atmos. Meas. Tech.*, 5(7),  
777 1491–1511, doi:10.5194/amt-5-1491-2012, 2012.
- 778 Aemisegger, F., Spiegel, J. K., Pfahl, S., Sodemann, H., Eugster, W. and Wernli, H.: Isotope  
779 meteorology of cold front passages: A case study combining observations and modeling,  
780 *Geophys. Res. Lett.*, 42(13), 5652–5660, doi:10.1002/2015GL063988, 2015.
- 781 Bastrikov, V., Steen-Larsen, H. C., Masson-Delmotte, V., Gribanov, K., Cattani, O., Jouzel, J.  
782 and Zakharov, V.: Continuous measurements of atmospheric water vapour isotopes in western  
783 Siberia (Kourovka), *Atmos. Meas. Tech.*, 7(6), 1763–1776, doi:10.5194/amt-7-1763-2014,  
784 2014.
- 785 Benetti, M., Reverdin, G., Pierre, C., Merlivat, L., Risi, C., Steen-Larsen, H. C. and Vimeux, F.:  
786 Deuterium excess in marine water vapor: Dependency on relative humidity and surface wind  
787 speed during evaporation, *J. Geophys. Res.*, 119(2), 584–593, doi:10.1002/2013JD020535,  
788 2014.
- 789 Bowen, G. J., Cai, Z., Fiorella, R. P. and Putman, A. L.: Isotopes in the Water Cycle: Regional-  
790 to Global-Scale Patterns and Applications, *Annu. Rev. Earth Planet. Sci.*, 47(1), 453–479,  
791 doi:10.1146/annurev-earth-053018-060220, 2019.
- 792 Cai, Y., Cheng, H., An, Z., Edwards, R. L., Wang, X., Tan, L. and Wang, J.: Large variations of  
793 oxygen isotopes in precipitation over south-central Tibet during Marine Isotope Stage 5,  
794 *Geology*, 38(3), 243–246, doi:10.1130/G30306.1, 2010.
- 795 Chakraborty, S., Sinha, N., Chattopadhyay, R., Sengupta, S., Mohan, P. M. and Datye, A.:  
796 Atmospheric controls on the precipitation isotopes over the Andaman Islands, Bay of Bengal,  
797 *Sci. Rep.*, 6, 19555 [online] Available from: <https://doi.org/10.1038/srep19555>, 2016.
- 798 Christner, E., Aemisegger, F., Pfahl, S., Werner, M., Cauquoin, A., Schneider, M., Hase, F.,  
799 Barthlott, S. and Schädler, G.: The Climatological Impacts of Continental Surface Evaporation,  
800 Rainout, and Subcloud Processes on  $\delta$ D of Water Vapor and Precipitation in Europe, *J.*  
801 *Geophys. Res. Atmos.*, 123(8), 4390–4409, doi:10.1002/2017JD027260, 2018.
- 802 Clark, I. D. and Fritz, P.: *Environmental Isotopes in Hydrogeology*, Lewis, Boca Raton, Florida.,  
803 1997.



- 804 Craig, H.: Isotopic Variations in Meteoric Waters, *Science* (80-. ), 133(3465), 1702–1703, 1961.  
805 Crosson, E. R.: A cavity ring-down analyzer for measuring atmospheric levels of methane,  
806 carbon dioxide, and water vapor, *Appl. Phys. B*, 92(3), 403–408, doi:10.1007/s00340-008-  
807 3135-y, 2008.
- 808 Dansgaard, W.: Stable isotopes in precipitation, *Tellus*, 16(4), 436–468,  
809 doi:10.3402/tellusa.v16i4.8993, 1964.
- 810 Deshpande, R. D., Maurya, A. S., Kumar, B., Sarkar, A. and Gupta, S. K.: Rain-vapor  
811 interaction and vapor source identification using stable isotopes from semiarid western India, *J.*  
812 *Geophys. Res. Atmos.*, 115(23), 1–11, doi:10.1029/2010JD014458, 2010.
- 813 Ellehoj, M. D., Steen-Larsen, H. C., Johnsen, S. J. and Madsen, M. B.: Ice-vapor equilibrium  
814 fractionation factor of hydrogen and oxygen isotopes: experimental investigations and  
815 implications for stable water isotope studies, *Rapid Commun. Mass Spectrom. Rcm*, 27(19),  
816 2149–2158, 2013.
- 817 Fiorella, R. P., Bares, R., Lin, J. C., Ehleringer, J. R. and Bowen, G. J.: Detection and variability  
818 of combustion-derived vapor in an urban basin, *Atmos. Chem. Phys.*, 18(12), 8529–8547,  
819 doi:10.5194/acp-18-8529-2018, 2018.
- 820 Froehlich, K., Kralik, M., Papesch, W., Rank, D., Scheifinger, H. and Stichler, W.: Deuterium  
821 excess in precipitation of Alpine regions – moisture recycling, *Isotopes Environ. Health Stud.*,  
822 44(1), 61–70, doi:10.1080/10256010801887208, 2008.
- 823 Gat, J. R.: OXYGEN AND HYDROGEN ISOTOPES IN THE HYDROLOGIC CYCLE, *Annu.*  
824 *Rev. Earth Planet. Sci.*, 24(1), 225–262, doi:10.1146/annurev.earth.24.1.225, 1996.
- 825 Gorski, G., Strong, C., Good, S. P., Bares, R., Ehleringer, J. R. and Bowen, G. J.: Vapor  
826 hydrogen and oxygen isotopes reflect water of combustion in the urban atmosphere, *Proc. Natl.*  
827 *Acad. Sci.*, 112(11), 3247–3252, doi:10.1073/pnas.1424728112, 2015.
- 828 Graf, P., Wernli, H., Pfahl, S. and Sodemann, H.: A new interpretative framework for below-  
829 cloud effects on stable water isotopes in vapour and rain, *Atmos. Chem. Phys.*, 19(2), 747–765,  
830 doi:10.5194/acp-19-747-2019, 2019.
- 831 Griffis, T. J., Wood, J. D., Baker, J. M., Lee, X., Xiao, K., Chen, Z., Welp, L. R., Schultz, N. M.,  
832 Gorski, G., Chen, M. and Nieber, J.: Investigating the source, transport, and isotope  
833 composition of water vapor in the planetary boundary layer, *Atmos. Chem. Phys.*, 16(8), 5139–  
834 5157, doi:10.5194/acp-16-5139-2016, 2016.
- 835 Gupta, P., Noone, D., Galewsky, J., Sweeney, C. and Vaughn, B. H.: Demonstration of high-  
836 precision continuous measurements of water vapor isotopologues in laboratory and remote  
837 field deployments using wavelength-scanned cavity ring-down spectroscopy (WS-CRDS)  
838 technology, *Rapid Commun Mass Spectrom*, 23(16), 2009.
- 839 Horita, J. and Wesolowski, D. J.: Liquid-vapor fractionation of oxygen and hydrogen isotopes  
840 of water from the freezing to the critical temperature, *Geochim. Cosmochim. Acta*, 58(16),  
841 3425–3437, 1994.
- 842 Jacob, H. and Sonntag, C.: An 8-year record of the seasonal variation of  $2\text{ H}$  and  $18\text{ O}$  in  
843 atmospheric water vapour and precipitation at Heidelberg, Germany, *Tellus B Chem. Phys.*



- 844 Meteorol., 43(3), 291–300, doi:10.3402/tellusb.v43i3.15276, 1991.
- 845 Jeelani, G., Deshpande, R. D., Galkowski, M. and Rozanski, K.: Isotopic composition of daily  
846 precipitation along the southern foothills of the Himalayas: Impact of marine and continental  
847 sources of atmospheric moisture, Atmos. Chem. Phys., 18(12), 8789–8805, doi:10.5194/acp-  
848 18-8789-2018, 2018.
- 849 Kong, Y., Pang, Z. and Froehlich, K.: Quantifying recycled moisture fraction in precipitation of  
850 an arid region using deuterium excess . Tellus Series B Chem Phys Meteorol Quantifying  
851 recycled moisture fraction in precipitation of an arid region using deuterium excess, Tellus B,  
852 65(August 2015), 1–8, doi:10.3402/tellusb.v65i0.19251, 2013.
- 853 Laskar, A. H., Huang, J. C., Hsu, S. C., Bhattacharya, S. K., Wang, C. H. and Liang, M. C.:  
854 Stable isotopic composition of near surface atmospheric water vapor and rain-vapor interaction  
855 in Taipei, Taiwan, J. Hydrol., 519(PB), 2091–2100, doi:10.1016/j.jhydrol.2014.10.017, 2014.
- 856 Li, L. and Garzzone, C. N.: Spatial distribution and controlling factors of stable isotopes in  
857 meteoric waters on the Tibetan Plateau : Implications for paleoelevation reconstruction, Earth  
858 Planet. Sci. Lett., 460, 302–314, doi:10.1016/j.epsl.2016.11.046, 2017.
- 859 Li, Z., Qi, F., Wang, Q. J., Kong, Y., Cheng, A., Song, Y., Li, Y., Li, J. and Guo, X.: Contributions  
860 of local terrestrial evaporation and transpiration to precipitation using  $\delta$  18 O and D-excess as  
861 a proxy in Shiyang inland river basin in China, Glob. Planet. Chang., 146, 140–151, 2016a.
- 862 Li, Z., Feng, Q., Wang, Y., Li, J., Guo, X. and Li, Y.: Effect of sub-cloud evaporation on the  $\delta$   
863 18 O of precipitation in Qilian Mountains and Hexi Corridor , China, Sci. Cold Arid Reg., 8(5),  
864 378–387, doi:10.3724/SP.J.1226.2016.00378.Effect, 2016b.
- 865 Liu, W., Feng, X., Liu, Y., Zhang, Q. and An, Z.:  $\delta$ 18O values of tree rings as a proxy of monsoon  
866 precipitation in arid Northwest China, Chem. Geol., 206(1), 73–80,  
867 doi:https://doi.org/10.1016/j.chemgeo.2004.01.010, 2004.
- 868 Liu, W., Liu, H., Wang, Z., An, Z. and Cao, Y.: Hydrogen isotopic compositions of long-chain  
869 leaf wax n-alkanes in Lake Qinghai sediments record palaeohydrological variations during the  
870 past 12 ka, Quat. Int., 449, 67–74, doi:https://doi.org/10.1016/j.quaint.2017.05.024, 2017a.
- 871 Liu, W., Wang, H., Leng, Q., Liu, H., Zhang, H. and Xing, M.: Hydrogen isotopic compositions  
872 along a precipitation gradient of Chinese Loess Plateau : Critical roles of precipitation /  
873 evaporation and vegetation change as controls for leaf wax  $\delta$  D, Chem. Geol., 528(April),  
874 119278, doi:10.1016/j.chemgeo.2019.119278, 2019.
- 875 Liu, Y., Liu, H., Song, H., Li, Q., Burr, G. S., Wang, L. and Hu, S.: A monsoon-related 174-year  
876 relative humidity record from tree-ring  $\delta$ 18O in the Yaoshan region, eastern central China, Sci.  
877 Total Environ., 593–594, 523–534, doi:https://doi.org/10.1016/j.scitotenv.2017.03.198, 2017b.
- 878 Ma, Q., Zhang, M., Wang, S., Wang, Q., Liu, W., Li, F. and Chen, F.: An investigation of  
879 moisture sources and secondary evaporation in Lanzhou, Northwest China, Environ. Earth Sci.,  
880 71(8), 3375–3385, doi:10.1007/s12665-013-2728-x, 2014.
- 881 Müller, S., Stumpp, C., Sørensen, J. H. and Jessen, S.: Spatiotemporal variation of stable  
882 isotopic composition in precipitation: Post-condensational effects in a humid area, Hydrol.  
883 Process., 31(18), 3146–3159, doi:10.1002/hyp.11186, 2017.



- 884 Noone, D., Galewsky, J., Sharp, Z. D., Worden, J., Barnes, J., Baer, D., Bailey, A., Brown, D.  
885 P., Christensen, L., Crosson, E., Dong, F., Hurley, J. V., Johnson, L. R., Strong, M., Toohey,  
886 D., Van Pelt, A. and Wright, J. S.: Properties of air mass mixing and humidity in the subtropics  
887 from measurements of the D/H isotope ratio of water vapor at the Mauna Loa Observatory, *J.*  
888 *Geophys. Res. Atmos.*, 116(22), 1–18, doi:10.1029/2011JD015773, 2011.
- 889 Noone, D., Risi, C., Bailey, A., Berkelhammer, M., Brown, D. P., Buening, N., Gregory, S.,  
890 Nusbaumer, J., Schneider, D., Sykes, J., Vanderwende, B., Wong, J., Meillier, Y. and Wolfe,  
891 D.: Determining water sources in the boundary layer from tall tower profiles of water vapor and  
892 surface water isotope ratios after a snowstorm in Colorado, *Atmos. Chem. Phys.*, 13(3), 1607–  
893 1623, doi:10.5194/acp-13-1607-2013, 2013.
- 894 Peng, H., Mayer, B., Harris, S. and Krouse, H. R.: The influence of below-cloud secondary  
895 effects on the stable isotope composition of hydrogen and oxygen in precipitation at Calgary,  
896 Alberta, Canada, *Tellus, Ser. B Chem. Phys. Meteorol.*, 59(4), 698–704, doi:10.1111/j.1600-  
897 0889.2007.00291.x, 2007.
- 898 Peng, T. R., Liu, K. K., Wang, C. H. and Chuang, K. H.: A water isotope approach to assessing  
899 moisture recycling in the island-based precipitation of Taiwan: A case study in the western  
900 Pacific, *Water Resour. Res.*, 47(8), 1–11, doi:10.1029/2010WR009890, 2011.
- 901 Putman, A. L., Fiorella, R. P., Bowen, G. J. and Cai, Z.: A Global Perspective on Local Meteoric  
902 Water Lines: Meta-analytic Insight into Fundamental Controls and Practical Constraints, *Water*  
903 *Resour. Res.*, 2019WR025181, doi:10.1029/2019WR025181, 2019.
- 904 Rangarajan, R., Laskar, A. H., Bhattacharya, S. K., Shen, C. C. and Liang, M. C.: An insight  
905 into the western Pacific wintertime moisture sources using dual water vapor isotopes, *J. Hydrol.*,  
906 547, 111–123, doi:10.1016/j.jhydrol.2017.01.047, 2017.
- 907 Salamalikis, V., Argiriou, A. A. and Dotsika, E.: Isotopic modeling of the sub-cloud evaporation  
908 effect in precipitation, *Sci. Total Environ.*, 544, 1059–1072, doi:10.1016/j.scitotenv.2015.11.072,  
909 2016.
- 910 Salmon, O. E., Welp, L. R., Baldwin, M., Hajny, K., Stirm, B. H. and Shepson, P. B.: Vertical  
911 profile observations of water vapor deuterium excess in the lower troposphere, *Atmos. Chem.*  
912 *Phys. Discuss.*, (January), 1–35, doi:10.5194/acp-2018-1313, 2019.
- 913 Steen-Larsen, H. C., Johnsen, S. J., Masson-Delmotte, V., Stenni, B., Risi, C., Sodemann, H.,  
914 Balslev-Clausen, D., Blunier, T., Dahl-Jensen, D., Ellehøj, M. D., Falourd, S., Grindsted, A.,  
915 Gkinis, V., Jouzel, J., Popp, T., Sheldon, S., Simonsen, S. B., Sjolte, J., Steffensen, J. P.,  
916 Sperlich, P., Sveinbjörnsdóttir, A. E., Vinther, B. M. and White, J. W. C.: Continuous monitoring  
917 of summer surface water vapor isotopic composition above the Greenland Ice Sheet, *Atmos.*  
918 *Chem. Phys.*, 13(9), 4815–4828, doi:10.5194/acp-13-4815-2013, 2013.
- 919 Steen-Larsen, H. C., Masson-Delmotte, V., Hirabayashi, M., Winkler, R., Satow, K., Prié, F.,  
920 Bayou, N., Brun, E., Cuffey, K. M., Dahl-Jensen, D., Dumont, M., Guillevic, M., Kipfstuhl, S.,  
921 Landais, A., Popp, T., Risi, C., Steffen, K., Stenni, B. and Sveinbjörnsdóttir, A. E.: What controls  
922 the isotopic composition of Greenland surface snow?, *Clim. Past*, 10(1), 377–392,  
923 doi:10.5194/cp-10-377-2014, 2014.



- 924 Stewart, M. K.: Stable isotope fractionation due to evaporation and isotopic exchange of falling  
925 waterdrops: Applications to atmospheric processes and evaporation of lakes, *J. Geophys. Res.*,  
926 80(9), 1133–1146, doi:10.1029/JC080i009p01133, 1975.
- 927 Sun, C., Chen, Y., Li, J., Chen, W. and Li, X.: Stable isotope variations in precipitation in the  
928 northwesternmost Tibetan Plateau related to various meteorological controlling factors, *Atmos.*  
929 *Res.*, 227(April), 66–78, doi:10.1016/j.atmosres.2019.04.026, 2019.
- 930 Sun, C., Chen, W., Chen, Y. and Cai, Z.: Stable isotopes of atmospheric precipitation and its  
931 environmental drivers in the Eastern Chinese Loess Plateau, China, *J. Hydrol.*, 581(November  
932 2019), 124404, doi:10.1016/j.jhydrol.2019.124404, 2020.
- 933 Tan, L., An, Z., Huh, C.-A., Cai, Y., Shen, C.-C., Shiau, L.-J., Yan, L., Cheng, H. and Edwards,  
934 R. L.: Cyclic precipitation variation on the western Loess Plateau of China during the past four  
935 centuries, *Sci. Rep.*, 4(1), 6381, doi:10.1038/srep06381, 2014.
- 936 Thompson, L. G., Yao, T., Mosley-Thompson, E., Davis, M. E., Henderson, K. A. and Lin, P.-  
937 N.: A High-Resolution Millennial Record of the South Asian Monsoon from Himalayan Ice Cores,  
938 *Science* (80-. ), 289(5486), 1916 LP – 1919, doi:10.1126/science.289.5486.1916, 2000.
- 939 Tian, C., Wang, L., Kaseke, K. F. and Bird, B. W.: Stable isotope compositions ( $\delta^2\text{H}$ ,  $\delta^{18}\text{O}$   
940 and  $\delta^{17}\text{O}$ ) of rainfall and snowfall in the central United States, *Sci. Rep.*, (October 2017), 1–  
941 15, doi:10.1038/s41598-018-25102-7, 2018.
- 942 Wan, H., Liu, W. and Xing, M.: Isotopic composition of atmospheric precipitation and its tracing  
943 significance in the Laohequ Basin, Loess plateau, China, *Sci. Total Environ.*, 640–641(May),  
944 989–996, doi:10.1016/j.scitotenv.2018.05.338, 2018.
- 945 Wang, S., Zhang, M., Che, Y., Chen, F. and Fang, Q.: Contribution of recycled moisture to  
946 precipitation in oases of arid central Asia: A stable isotope approach, *Water Resour. Res.*, 52(4),  
947 3246–3257, doi:10.1002/2015WR018135, 2016a.
- 948 Wang, S., Zhang, M., Che, Y., Zhu, X. and Liu, X.: Influence of Below-Cloud Evaporation on  
949 Deuterium Excess in Precipitation of Arid Central Asia and Its Meteorological Controls, *J.*  
950 *Hydrometeorol.*, 17(7), 1973–1984, doi:10.1175/JHM-D-15-0203.1, 2016b.
- 951 Wang, S., Zhang, M., Hughes, C. E., Crawford, J., Wang, G., Chen, F., Du, M., Qiu, X. and  
952 Zhou, S.: Meteoric water lines in arid Central Asia using event-based and monthly data, *J.*  
953 *Hydrol.*, 562(May), 435–445, doi:10.1016/j.jhydrol.2018.05.034, 2018a.
- 954 Wang, Z., An, Z., Liu, Z., Qiang, X., Zhang, F. and Liu, W.: Hydroclimatic variability in loess  
955  $\delta\text{D}_{\text{wax}}$  records from the central Chinese Loess Plateau over the past 250 ka, *J. Asian Earth*  
956 *Sci.*, 155, 49–57, doi:https://doi.org/10.1016/j.jseaes.2017.11.008, 2018b.
- 957 Welp, L. R., Lee, X., Kim, K., Griffis, T. J., Billmark, K. A. and Baker, J. M.:  $\delta^{18}\text{O}$  of water  
958 vapour, evapotranspiration and the sites of leaf water evaporation in a soybean canopy, *Plant*,  
959 *Cell Environ.*, 31(9), 1214–1228, doi:10.1111/j.1365-3040.2008.01826.x, 2008.
- 960 Welp, L. R., Lee, X., Griffis, T. J., Wen, X. F., Xiao, W., Li, S., Sun, X., Hu, Z., Val Martin, M.  
961 and Huang, J.: A meta-analysis of water vapor deuterium-excess in the midlatitude atmospheric  
962 surface layer, *Global Biogeochem. Cycles*, 26(3), 1–12, doi:10.1029/2011GB004246, 2012.
- 963 Wen, X., Yang, B., Sun, X. and Lee, X.: Evapotranspiration partitioning through in-situ oxygen



964 isotope measurements in an oasis cropland, *Agric. For. Meteorol.*, 230–231, 89–96,  
965 doi:10.1016/j.agrformet.2015.12.003, 2016.

966 Wen, X. F., Zhang, S. C., Sun, X. M., Yu, G. R. and Lee, X.: Water vapor and precipitation  
967 isotope ratios in Beijing, China, *J. Geophys. Res. Atmos.*, 115(1), 1–10,  
968 doi:10.1029/2009JD012408, 2010.

969 Yao, T., Thompson, L. G., Mosley-Thompson, E., Zhihong, Y., Xingping, Z. and Lin, P.-N.:  
970 Climatological significance of  $\delta^{18}\text{O}$  in north Tibetan ice cores, *J. Geophys. Res. Atmos.*,  
971 101(D23), 29531–29537, doi:10.1029/96JD02683, 1996.

972 Yao, T., Masson-Delmotte, V., Gao, J., Yu, W., Yang, X., Risi, C., Sturm, C., Werner, M., Zhao,  
973 H., He, Y., Ren, W., Tian, L., Shi, C. and Hou, S.: A review of climatic controls on  $\delta^{18}\text{O}$  in  
974 precipitation over the Tibetan Plateau: Observations and simulations, *Rev. Geophys.*, 51(4),  
975 525–548, doi:10.1002/rog.20023, 2013.

976 Yu, W., Tian, L., Ma, Y., Xu, B. and Qu, D.: Simultaneous monitoring of stable oxygen isotope  
977 composition in water vapour and precipitation over the central Tibetan Plateau, *Atmos. Chem.*  
978 *Phys.*, 15(18), 10251–10262, doi:10.5194/acp-15-10251-2015, 2015.

979 Yu, W., Tian, L., Risi, C., Yao, T., Ma, Y., Zhao, H., Zhu, H., He, Y., Xu, B., Zhang, H. and Qu,  
980 D.:  $\delta^{18}\text{O}$  records in water vapor and an ice core from the eastern Pamir Plateau: Implications  
981 for paleoclimate reconstructions, *Earth Planet. Sci. Lett.*, 456, 146–156,  
982 doi:10.1016/j.epsl.2016.10.001, 2016.

983 Zhang, M. and Wang, S.: A review of precipitation isotope studies in China: Basic pattern and  
984 hydrological process, *J. Geogr. Sci.*, 26(7), 921–938 [online] Available from:  
985 <http://www.geogsci.com>, 2016.

986 Zhao, L., Liu, X., Wang, N., Kong, Y., Song, Y., He, Z., Liu, Q. and Wang, L.: Contribution of  
987 recycled moisture to local precipitation in the inland Heihe River Basin, *Agric. For. Meteorol.*,  
988 271(July 2018), 316–335, doi:10.1016/j.agrformet.2019.03.014, 2019.

989 Zhu, G. F., Li, J. F., Shi, P. J., He, Y. Q., Cai, A., Tong, H. L., Liu, Y. F. and Yang, L.:  
990 Relationship between sub-cloud secondary evaporation and stable isotope in precipitation in  
991 different regions of China, *Environ. Earth Sci.*, 75(10), 876, 2016.

992
